# Supplementary material for: SGLT2 Inhibition by Intraperitoneal Dapagliflozin Mitigates Peritoneal Fibrosis and Ultrafiltration Failure in a Mouse Model of Chronic Peritoneal Exposure to High-Glucose Dialysate
Source: MDPI journal article supplement (doi:10.3390/biom10111573), 2020-11-19

# Supplementary Figure 1

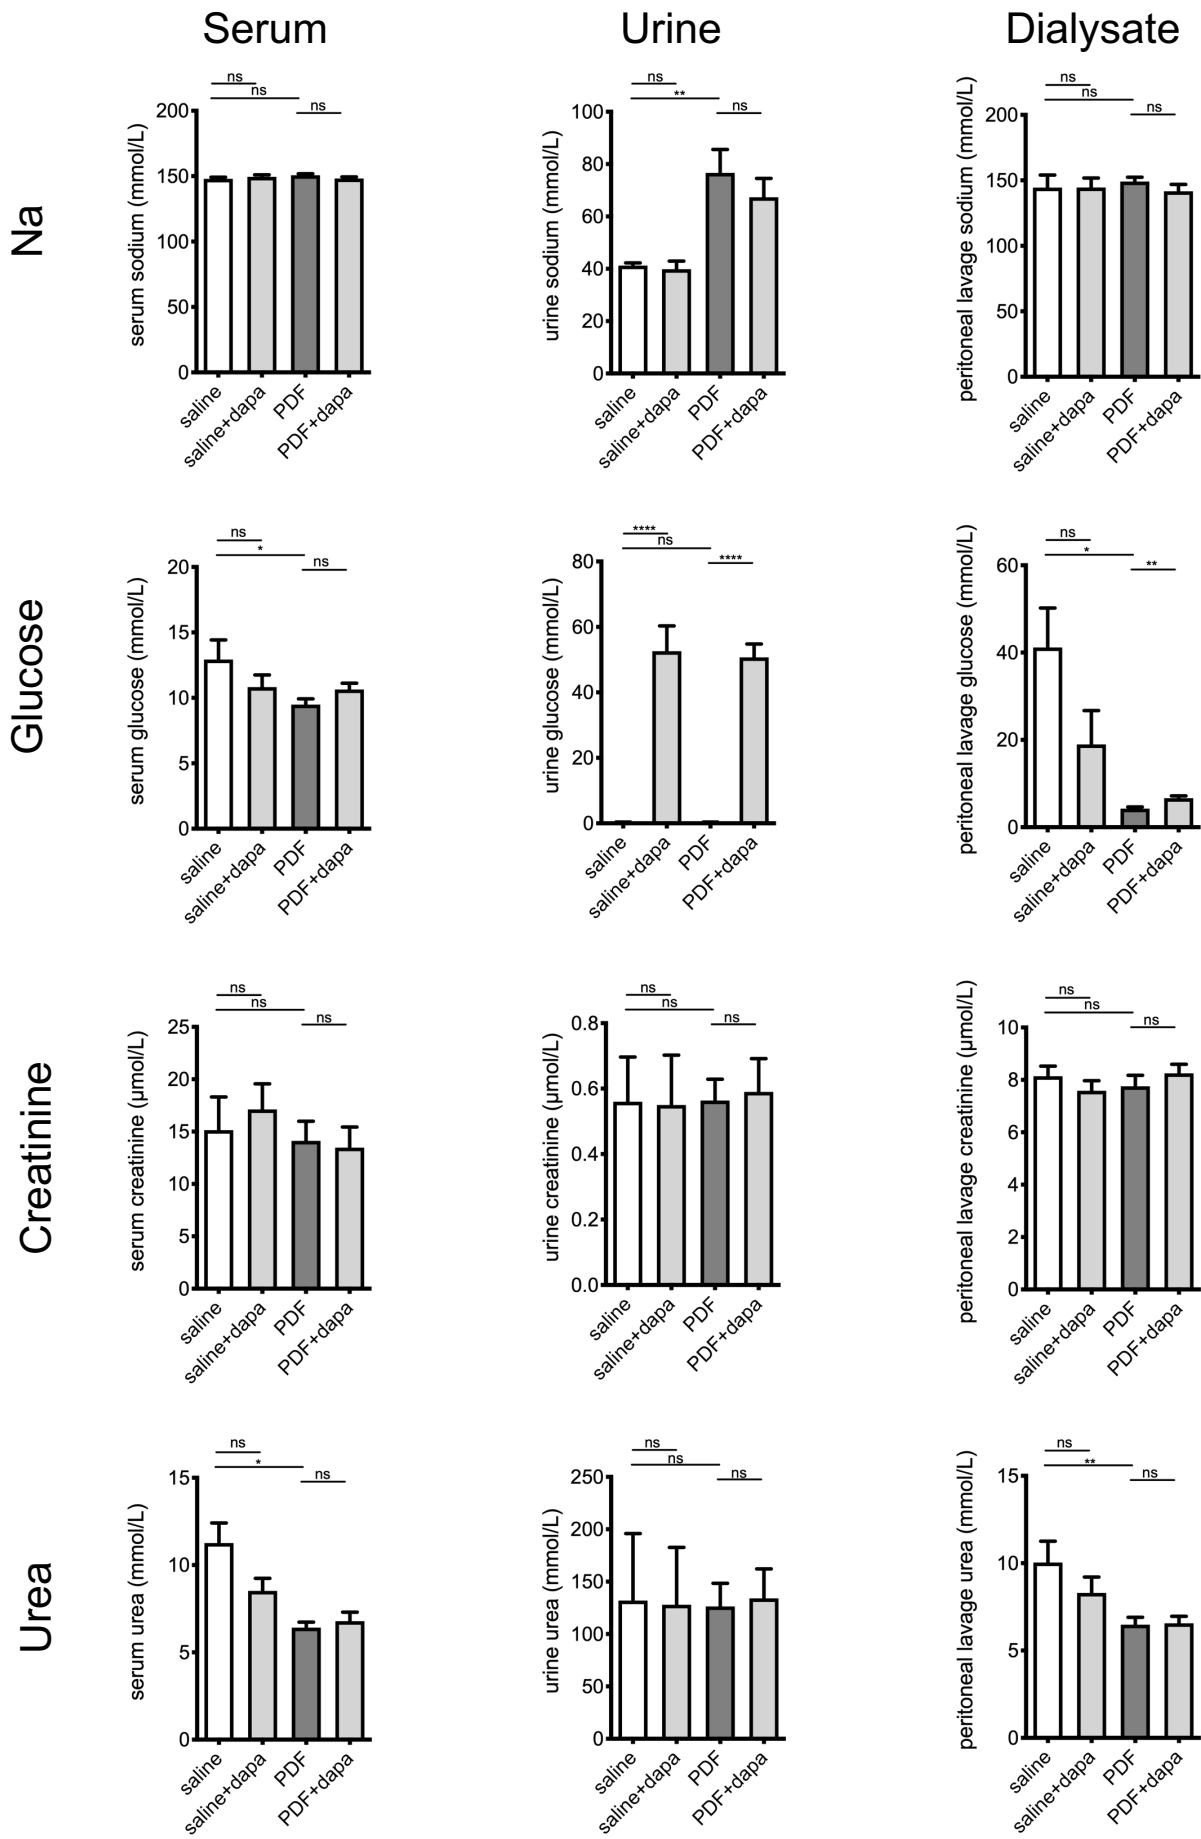

# Supplementary Figure 2

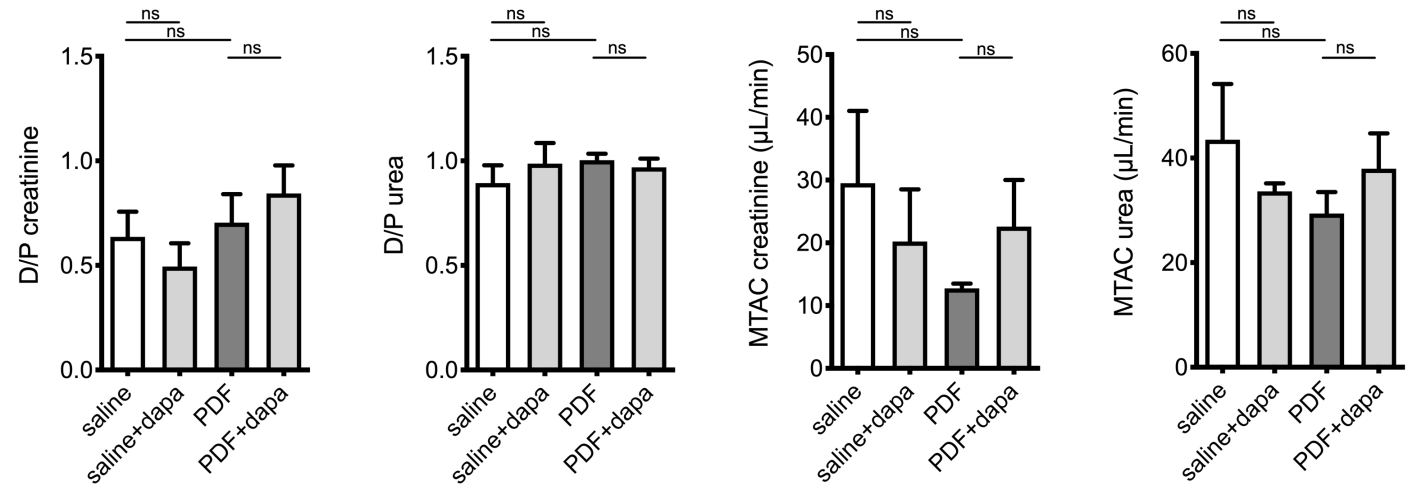

Supplement: s1 [file s1]
